# Supplementary material for: Electrical control of carriers' spin orientation in the FeVTiSi Heusler alloy
Source: Royal Society of Chemistry journal article supplement (doi:10.1039/c4tc02587c), 2015-01-01
Supplement: c4tc02587c1.pdf [file c4tc02587c1.pdf]

## Electronic Supporting Information

# Electrical Control of Carriers' Spin Orientation in FeVTiSi Heusler Alloy

Jiahui Zhang,<sup>a</sup> Xingxing Li<sup>a</sup> and Jinlong Yang<sup>ab\*</sup>

<sup>a</sup>*Hefei National Laboratory for Physical Science at the Microscale, University of Science and Technology of China, Hefei, Anhui 230026, China.*

<sup>b</sup>*Synergetic Innovation Center of Quantum Information and Quantum Physics, University of Science and Technology of China, Hefei, Anhui 230026, China*

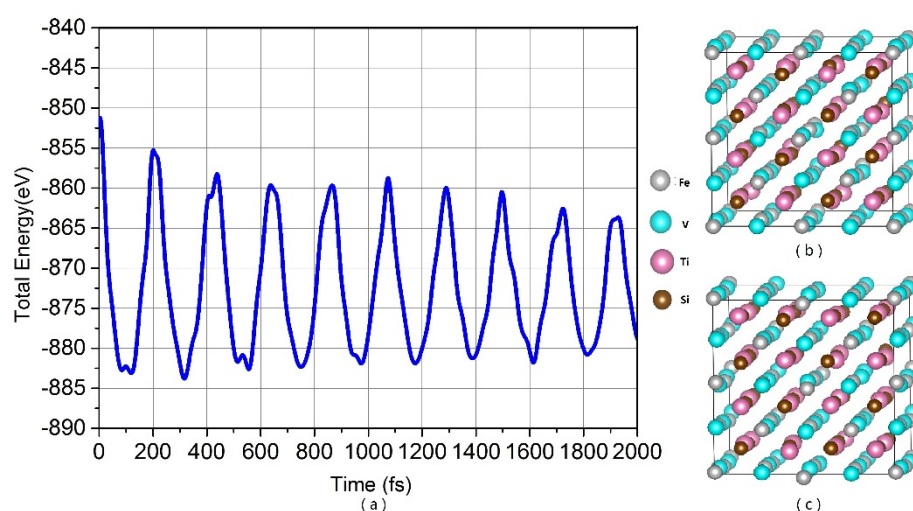

Figure S1. (a) Fluctuations of total energy during 2.0 ps MD simulation at 1000 K. Structures at (b) 1.0 ps and (c) 2.0 ps are given.

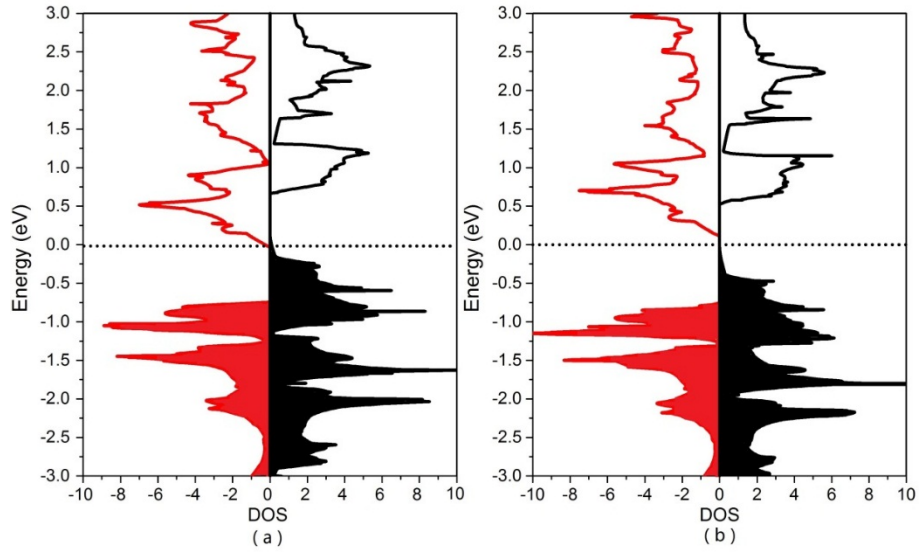

Figure S2. The calculated density of states based on (a) GGA and (b) GGA+U functional for FeVTiSi Heusler alloy. The Fermi level is set at zero.

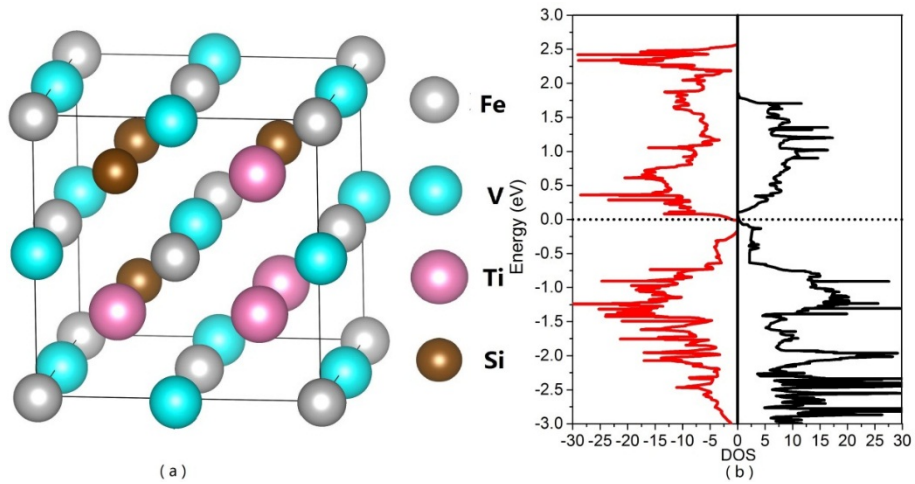

Figure S3. (a) Illustration of 25% Ti-Si disorder in a cubic supercell and (b) its calculated density of states based on GGA+U functional.

Table S1. Calculated total and partial spin moments in  $\mu_B$  for FeVTiSi based on HSE06 functional.

| $m^{\text{Fe}}$ | $m^{\text{V}}$ | $m^{\text{Ti}}$ | $m^{\text{Si}}$ | $m^{\text{total}}$ |
|-----------------|----------------|-----------------|-----------------|--------------------|
| -0.56           | 2.95           | 0.66            | -0.05           | 3.00               |
